# Supplementary material
Source: ML conference proceedings conference paper supplement (https://proceedings.mlr.press/v97/geng19a.html)
Supplement: Supplementary file [file geng19a-supp.pdf]

## Supplements

### A. Proof of Theorem 1

Following the definition, we can derive the PL for the PLA-GGM as:

$$\ell_{PL} \left( \{\mathbf{z}_i, g_i\}_{i \in [n]}; \mathbf{R}(\cdot), \boldsymbol{\Omega}_0 \right) \propto \sum_{i=1}^n \sum_{j=1}^p \left\{ z_{ij} \left( \Omega_{ijj} + \sum_{j' \neq j} \Omega_{ijj'} z_{ij} z_{ij'} \right) - \frac{1}{2} z_{ij}^2 \right. \\ \left. - \frac{1}{2} \left( \Omega_{ijj} + \sum_{j' \neq j} \Omega_{ijj'} z_{ij} z_{ij'} \right)^2 \right\}.$$

Then Lemma 1 can be proved by the definition of  $\mathbf{z}_{i,-j}$ .

### B. Proof of Lemma 2

According to the analysis in Section 3.1, we treat the PL as  $p$  partially-linear additive linear regressions. Then, for each regression, we can derive  $\hat{M}_{ij}$  as the estimation to the smooth part following the rationale in (Fan et al., 2005). Combining the results for every regression, we can derive Lemma 2.

### C. Proof of Theorem 1

In this Section, we prove the  $\sqrt{n}$ -sparsistency of the  $L_1$ -regularized MPPL by following the widely-used primal-dual witness proof technique (Wainwright, 2009; Ravikumar et al., 2010; Yang & Ravikumar, 2011; Yang et al., 2015a). PDW is characterized by the following Lemma 3:

**Lemma 3.** *Let  $\hat{\boldsymbol{\Omega}}_0$  be an optimal solution to (5), and  $\hat{\mathbf{Z}}$  be the corresponding dual solution. If  $\hat{\mathbf{Z}}$  satisfies  $\|\hat{\mathbf{Z}}_N\|_\infty < 1$ , then any given optimal solution to (5)  $\tilde{\boldsymbol{\Omega}}_0$  satisfies  $\tilde{\boldsymbol{\Omega}}_{0I} = \mathbf{0}$ . Moreover, if  $\mathbf{H}_{SS}$  is positive definite, then the solution to (5) is unique.*

*Proof.* Specifically, following the same rationale as Lemma 1 in Wainwright 2009, Lemma 1 in Ravikumar et al. 2010, and Lemma 2 in Yang & Ravikumar 2011, we can derive Lemma 3 characterizing the optimal solution of (5).  $\square$

**Bound  $\|\nabla F(\boldsymbol{\Omega}_0^*)\|_\infty$**

Before we use the PDW, we first provide a Lemma bounding  $\|\nabla F(\boldsymbol{\Omega}_0^*)\|_\infty$ , which has been shown to be vital for PDW (Wainwright, 2009; Ravikumar et al., 2010; Yang & Ravikumar, 2011; Yang et al., 2015a).

**Lemma 4.** *Let  $r := 4C_5\lambda$ . For any  $\epsilon_d > 0$ , with probability of at least  $1 - \epsilon_d$ , there exists  $C_4 > 0$  and  $N_d > 0$  satisfying the following two inequalities:*

$$\|\nabla F(\boldsymbol{\Omega}_0^*)\|_\infty \leq C_4 \sqrt{\frac{\log p}{n}}, \quad (8)$$

$$\|\tilde{\boldsymbol{\Theta}}_S - \boldsymbol{\Theta}_S^*\|_\infty \leq r, \quad (9)$$

for  $n > N_d$ .

*Proof.* We prove (8) and (9) in turn.

PROOF OF (8)

To begin with, we prove (8). We define

$$\lambda_{ij}^* = (\mathbf{1}_i - \mathbf{S}_{ij})^\top \mathbf{x}_j \boldsymbol{\Omega}_{0,j}^*.$$

We use the  $F$  to denote the PPL defined in Definition 1. Then, the derivative of  $F(\Omega_{0,j}^*)$  is:

$$\begin{aligned} \frac{\partial F(\Omega_0^*)}{\partial \Omega_{0,j}^*} &= \frac{\sum_{i=1}^n \left\{ -(\mathbf{1}_i - \mathbf{S}_{ij})^\top \mathbf{y}_j \left[ (\mathbf{1}_i - \mathbf{S}_{ij})^\top \mathbf{x}_j \right]_{j'} + \lambda_{ij}^* \left[ (\mathbf{1}_i - \mathbf{S}_{ij})^\top \mathbf{x}_j \right]_{j'} \right\}}{n} \\ &+ \frac{\sum_{i=1}^n \left\{ -(\mathbf{1}_i - \mathbf{S}_{ij'})^\top \mathbf{y}_{j'} \left[ (\mathbf{1}_i - \mathbf{S}_{ij'})^\top \mathbf{x}_{j'} \right]_j + \lambda_{ij'}^* \left[ (\mathbf{1}_i - \mathbf{S}_{ij'})^\top \mathbf{x}_{j'} \right]_j \right\}}{n}, \end{aligned} \quad (10)$$

where  $[\cdot]_j$  denotes the  $j^{\text{th}}$  component of the vector. For the ease of presentation, we define

$$\mathbf{y}'_j = \begin{bmatrix} (\mathbf{1}_1 - \mathbf{S}_{1j})^\top \mathbf{y}_j \\ \vdots \\ (\mathbf{1}_n - \mathbf{S}_{nj})^\top \mathbf{y}_j \end{bmatrix} \quad \text{and} \quad \mathbf{x}'_j = \begin{bmatrix} (\mathbf{1}_1 - \mathbf{S}_{1j})^\top \mathbf{x}_j \\ \vdots \\ (\mathbf{1}_n - \mathbf{S}_{nj})^\top \mathbf{x}_j \end{bmatrix}.$$

Then, we consider

$$\frac{\mathbf{x}'_j{}^\top \mathbf{x}'_j \Omega_{0,j}^* - \mathbf{x}'_j{}^\top \mathbf{y}'_j}{n}, \quad (11)$$

whose  $j^{\text{th}}$  component is just the target value

$$\frac{\sum_{i=1}^n \left\{ -(\mathbf{1}_i - \mathbf{S}_{ij})^\top \mathbf{y}_j \left[ (\mathbf{1}_i - \mathbf{S}_{ij})^\top \mathbf{x}_j \right]_{j'} + \lambda_{ij}^* \left[ (\mathbf{1}_i - \mathbf{S}_{ij})^\top \mathbf{x}_j \right]_{j'} \right\}}{n}.$$

Therefore, we focus on bounding (11). Then,

$$\begin{aligned} \frac{\mathbf{x}'_j{}^\top \mathbf{x}'_j \Omega_{0,j}^* - \mathbf{x}'_j{}^\top \mathbf{y}'_j}{n} &= \frac{\mathbf{x}'_j{}^\top \mathbf{x}'_j \left[ \Omega_{0,j}^* - \left( \mathbf{x}'_j{}^\top \mathbf{x}'_j \right)^{-1} \mathbf{x}'_j{}^\top \mathbf{y}'_j \right]}{n}, \\ &= \frac{\mathbf{x}'_j{}^\top (\mathbf{I} - \mathbf{S}_j) (\mathbf{M}_j + \epsilon_j)}{n} \end{aligned}$$

where the second equality is due to Lemma 5.

We first study  $\frac{\mathbf{x}'_j{}^\top (\mathbf{I} - \mathbf{S}_j) \mathbf{M}_j}{n}$ : according to Lemma 8, for any  $\epsilon_a > 0$ , there exists  $\delta_a > 0$  and  $N_a > 0$  satisfying

$$\mathbf{P} \left\{ \left\| \frac{\mathbf{x}'_j{}^\top (\mathbf{I} - \mathbf{S}_j) \mathbf{M}_j}{n} \right\|_\infty > \delta_a \left[ \frac{\log(\frac{1}{h})}{nh} + h^4 + 2h^2 \sqrt{\frac{\log(\frac{1}{h})}{nh}} \right] \right\} < \epsilon_a,$$

with  $n > N_a$ .

According to Assumption 1

$$\mathbf{P} \left\{ \left\| \frac{\mathbf{x}'_j{}^\top (\mathbf{I} - \mathbf{S}_j) \mathbf{M}_j}{n} \right\|_\infty > \delta_a C_1 \sqrt{\frac{\log p}{n}} \right\} < \epsilon_a. \quad (12)$$

Now, we study  $\frac{\mathbf{x}'_j{}^\top (\mathbf{I} - \mathbf{S}_j) \epsilon_j}{n}$ . According to Lemma 9, we have

$$\begin{aligned} \frac{\mathbf{x}'_j{}^\top (\mathbf{I} - \mathbf{S}_j) \epsilon_j}{n} &= \sum_{i=1}^n \left\{ \mathbf{x}_{ij} - \mathbb{E}^\top \left[ \mathbf{1}_{g_{i'} > g^*} \mathbf{Z}_{i,-j} \mathbf{Z}_{i,-j}^\top \mid g_i \right] \mathbb{E}^{-1} \left[ \mathbf{1}_{g_{i'} > g^*} \mathbf{Z}_{i,-j} \mathbf{Z}_{i,-j}^\top \mid g_i \right] \tilde{\mathbf{x}}_{ij} \right\} \\ &\quad \epsilon_{ij} (1 + o_p(1)) / n, \end{aligned}$$

uniformly for  $j$ . Note that  $\frac{\mathbf{x}_j^{\top}(\mathbf{I}-\mathbf{S}_j)\boldsymbol{\epsilon}_j}{n}$  is a  $p \times 1$  vector. Therefore, for the  $j'$ <sup>th</sup> component, we have

$$\begin{aligned} & \left| \left[ \frac{\mathbf{x}_j^{\top}(\mathbf{I}-\mathbf{S}_j)\boldsymbol{\epsilon}_j}{n} \right]_{j'} \right| \\ & \leq \left| \sum_{i:g^i \leq g^*} (1 - \mathbb{1}_{g^i > g^*}) z_{ij'} \boldsymbol{\epsilon}_{ij} \right| (1 + |o_p(1)|) / n \\ & = \frac{1}{2n} \left| \sum_{i=1} \left( (1 - \mathbb{1}_{g^i > g^*}) \left[ \left( \frac{z_{ij'} + \boldsymbol{\epsilon}_{ij}}{\sqrt{2}} \right)^2 - 1 - \left( \frac{z_{ij'} - \boldsymbol{\epsilon}_{ij}}{\sqrt{2}} \right)^2 + 1 \right] \right) \right| (1 + |o_p(1)|) \end{aligned} \quad (13)$$

It can be shown that  $\left( \frac{z_{ij'} + \boldsymbol{\epsilon}_{ij}}{\sqrt{2}} \right)^2$  and  $\left( \frac{z_{ij'} - \boldsymbol{\epsilon}_{ij}}{\sqrt{2}} \right)^2$  are independent and follow chi-squared distribution with degree equal to 1.

By Lemma 1 in (Laurent & Massart, 2000), the linear combination of chi-squared random variables satisfies:

$$\begin{aligned} & \mathbb{P} \left\{ \sum_{i=1} (1 - \mathbb{1}_{g^i > g^*}) \left[ \left( \frac{z_{ij'} + \boldsymbol{\epsilon}_{ij}}{\sqrt{2}} \right)^2 - 1 \right] \geq 2\sqrt{nx} + 2\epsilon_c \right\} \leq \exp(-\epsilon_c), \\ & \mathbb{P} \left\{ \sum_{i=1} (1 - \mathbb{1}_{g^i > g^*}) \left[ \left( \frac{z_{ij'} + \boldsymbol{\epsilon}_{ij}}{\sqrt{2}} \right)^2 - 1 \right] \leq -2\sqrt{nx} \right\} \leq \exp(-\epsilon_c), \\ & \mathbb{P} \left\{ -\sum_{i=1} (1 - \mathbb{1}_{g^i > g^*}) \left[ \left( \frac{z_{ij'} - \boldsymbol{\epsilon}_{ij}}{\sqrt{2}} \right)^2 - 1 \right] \leq -2\sqrt{nx} - 2\epsilon_c \right\} \leq \exp(-\epsilon_c), \end{aligned}$$

and

$$\mathbb{P} \left\{ -\sum_{i=1} (1 - \mathbb{1}_{g^i > g^*}) \left[ \left( \frac{z_{ij'} - \boldsymbol{\epsilon}_{ij}}{\sqrt{2}} \right)^2 - 1 \right] \geq 2\sqrt{nx} \right\} \leq \exp(-\epsilon_c),$$

for any  $\epsilon_c > 0$ . Combing the previous four probabilistic bounds, we can derive

$$\begin{aligned} & \mathbb{P} \left\{ \sum_{i=1} (1 - \mathbb{1}_{g^i > g^*}) \left[ \left( \frac{z_{ij'} + \boldsymbol{\epsilon}_{ij}}{\sqrt{2}} \right)^2 - 1 \right] \right. \\ & \quad \left. - \sum_{i=1} (1 - \mathbb{1}_{g^i > g^*}) \left[ \left( \frac{z_{ij'} - \boldsymbol{\epsilon}_{ij}}{\sqrt{2}} \right)^2 - 1 \right] \geq 4\sqrt{n\epsilon} + 2\epsilon_c \right\} \leq \exp(-2\epsilon_c) \end{aligned} \quad (14)$$

and

$$\begin{aligned} & \mathbb{P} \left\{ \sum_{i=1} (1 - \mathbb{1}_{g^i > g^*}) \left[ \left( \frac{z_{ij'} + \boldsymbol{\epsilon}_{ij}}{\sqrt{2}} \right)^2 - 1 \right] \right. \\ & \quad \left. - \sum_{i=1} (1 - \mathbb{1}_{g^i > g^*}) \left[ \left( \frac{z_{ij'} - \boldsymbol{\epsilon}_{ij}}{\sqrt{2}} \right)^2 - 1 \right] \leq -4\sqrt{n\epsilon} - 2\epsilon_c \right\} \leq \exp(-2\epsilon_c) \end{aligned} \quad (15)$$

Taking (14) and (15) into (13), we can derive

$$\mathbb{P} \left\{ \left| \left[ \frac{\mathbf{X}_j^{\top}(\mathbf{I}-\mathbf{S}_j)\boldsymbol{\epsilon}_j}{n} \right]_{j'} \right| \geq \left( 2\sqrt{\frac{\epsilon_c}{n}} + \frac{\epsilon_c}{n} \right) (1 + |o_p(1)|) \right\} \leq 2 \exp(-2\epsilon_c). \quad (16)$$

Then, by the definition of  $o_p(1)$ , for any  $\epsilon_b > 0$ , there exists  $N_b$  so that for  $n > N_b$ :

$$\mathbb{P} \{ |o_p(1)| \geq 1 \} \leq \epsilon_b. \quad (17)$$

Combining (16) and (17), we derive

$$\mathbb{P} \left\{ \left\| \frac{\mathbf{X}'_j{}^\top (\mathbf{I} - \mathbf{S}_j) \mathbf{M}_j}{n} \right\|_\infty \geq \left( 4\sqrt{\frac{\epsilon_c}{n}} + 2\frac{\epsilon_c}{n} \right) \right\} \leq 2p \exp(-2\epsilon_c) + \epsilon_b, \quad (18)$$

by a union bound. Eventually, according to (12) and (18), and by setting  $\epsilon_c = 2 \log p$  we prove:

$$\left\| \frac{\mathbf{x}'_j{}^\top \mathbf{x}'_j \boldsymbol{\Omega}_{0,j}^* - \mathbf{x}'_j{}^\top \mathbf{y}'_j}{n} \right\|_\infty \leq (6 + \delta_a C_1) \sqrt{\frac{2 \log p}{n}},$$

with probability larger than  $1 - \epsilon_b - \epsilon_a - 2p^{-1}$ . Thus, for any  $\epsilon_d > 0$ , there exists  $C_4 > 0$  and  $N_d > 0$

$$\|\nabla F(\boldsymbol{\Theta}^*)\|_\infty \leq C_4 \sqrt{\frac{\log p}{n}},$$

with probability larger than  $1 - \epsilon_d$ , for  $n > N_d$ .

PROOF OF (9)

To prove (9), we use the fixed point method by defining a map  $G(\boldsymbol{\Delta}_S) := -\mathbf{H}_{SS}^{-1} \left[ \nabla_S F(\boldsymbol{\Omega}_{0S}^* + \boldsymbol{\Delta}_S) + \lambda \hat{\mathbf{Z}}_S \right] + \boldsymbol{\Delta}_S$ . If  $\|\boldsymbol{\Delta}\|_\infty \leq r$ , by Taylor expansion of  $\nabla_S F(\boldsymbol{\Omega}_0^* + \boldsymbol{\Delta})$  centered at  $\nabla_S F(\boldsymbol{\Omega}_0^*)$ ,

$$\begin{aligned} \|G(\boldsymbol{\Delta}_S)\|_\infty &= \left\| -\mathbf{H}_{SS}^{-1} \left[ \nabla_S F(\boldsymbol{\Omega}_{0S}^*) + \mathbf{H}_{SS} \boldsymbol{\Delta}_S + \mathbf{R}_S(\boldsymbol{\Delta}) + \lambda \hat{\mathbf{Z}}_S \right] + \boldsymbol{\Delta}_S \right\|_\infty \\ &= \left\| -\mathbf{H}_{SS}^{-1} \left( \nabla_S F(\boldsymbol{\Omega}_{0S}^*) + \mathbf{R}_S(\boldsymbol{\Delta}) + \lambda \hat{\mathbf{Z}}_S \right) \right\|_\infty \\ &\leq \|\mathbf{H}_{SS}^{-1}\|_\infty \left( \|\nabla_S F(\boldsymbol{\Omega}_{0S}^*)\|_\infty + \|\mathbf{R}_S(\boldsymbol{\Delta})\|_\infty + \lambda \|\hat{\mathbf{Z}}_S\|_\infty \right) \\ &\leq C_2(\lambda + C_3 r^2 + \lambda) = C_2 C_3 r^2 + 2C_2 \lambda, \end{aligned}$$

where the inequality is due to Assumption 4 and Assumption 5, and  $\|\nabla_S F(\boldsymbol{\Theta}^*)\|_\infty \leq \lambda$  with a high probability, according to (8). Then, based on the definition of  $r$ , we can derive the upper bound of  $\|G(\boldsymbol{\Delta}_S)\|_\infty$  as  $\|G(\boldsymbol{\Delta}_S)\|_\infty \leq r/2 + r/2 = r$ .

Therefore, according to the fixed point theorem (Ortega & Rheinboldt, 2000; Yang & Ravikumar, 2011), there exists  $\boldsymbol{\Delta}_S$  satisfying  $G(\boldsymbol{\Delta}_S) = \boldsymbol{\Delta}_S$ , which indicates  $\nabla_S F(\boldsymbol{\Omega}_0^* + \boldsymbol{\Delta}) + \lambda \hat{\mathbf{Z}}_S = \mathbf{0}$ . The optimal solution to (20) is unique, and thus  $\tilde{\boldsymbol{\Delta}}_S = \boldsymbol{\Delta}_S$ . Therefore,  $\|\tilde{\boldsymbol{\Delta}}_S\|_\infty \leq r$ , with probability larger than  $1 - \epsilon$ .  $\square$

## PDW

By Lemma 3, we can prove the sparsistency by building an optimal solution to (5) satisfying the strict dual feasibility (SDF) defined as  $\|\hat{\mathbf{Z}}_N\|_\infty < 1$ , which is summarized. Therefore, we now build a solution by solving a restricted problem.

### SOLVE A RESTRICTED PROBLEM

First of all, we derive the KKT condition of (5):

$$\nabla F(\hat{\boldsymbol{\Omega}}_0) + \lambda \hat{\mathbf{Z}} = \mathbf{0}. \quad (19)$$

To construct an optimal primal-dual pair solution, we define  $\tilde{\boldsymbol{\Omega}}_0$  as an optimal solution to the restricted problem:

$$\tilde{\boldsymbol{\Omega}}_0 := \min_{\boldsymbol{\Omega}_0} F(\boldsymbol{\Omega}_0) + \lambda \|\boldsymbol{\Omega}_0\|_1, \quad (20)$$

with  $\boldsymbol{\Omega}_{0N} = \mathbf{0}$ .  $\tilde{\boldsymbol{\Omega}}_0$  is unique due to Lemma 3. Then, we define the subgradient corresponding to  $\tilde{\boldsymbol{\Omega}}_0$  as  $\tilde{\mathbf{Z}}$ . Therefore,  $(\tilde{\boldsymbol{\Omega}}_0, \tilde{\mathbf{Z}})$  is a pair of optimal solutions to the restricted problem (20).  $\tilde{\mathbf{Z}}_S$  is determined according to the values of  $\tilde{\boldsymbol{\Omega}}_{0S}$  via the KKT conditions of (20). Thus we have

$$\nabla_S F(\tilde{\boldsymbol{\Theta}}) + \lambda \tilde{\mathbf{Z}}_S = \mathbf{0}, \quad (21)$$

where  $\nabla_S$  represents the gradient components with respect to  $S$ . Letting  $\hat{\boldsymbol{\Omega}}_0 = \tilde{\boldsymbol{\Omega}}_0$ , we determine  $\hat{\mathbf{Z}}_N$  according to (19). It now remains to show that  $\hat{\mathbf{Z}}_N$  satisfies SDF.

SDF

Now, we demonstrate that  $\tilde{\Theta}$  and  $\tilde{\mathbf{Z}}$  satisfy SDF. We define  $\tilde{\Delta} := \tilde{\Theta} - \Theta^*$ . By (21), and by the Taylor expansion of  $\nabla_S F(\tilde{\Omega}_0)$ , we have that

$$\mathbf{H}_{SS} \tilde{\Delta}_S + \nabla_S F(\Omega_0^*) + \mathbf{R}_S(\tilde{\Delta}) + \lambda \tilde{\mathbf{Z}}_S = \mathbf{0},$$

which means

$$\tilde{\Delta}_S = \mathbf{H}_{SS}^{-1} \left[ -\nabla_S F(\Omega_0^*) - \mathbf{R}_S(\tilde{\Delta}) - \lambda \tilde{\mathbf{Z}}_S \right], \quad (22)$$

where  $\mathbf{H}_{SS}$  is positive definite and hence invertible.

By the definition of  $\tilde{\Omega}_0$  and  $\tilde{\mathbf{Z}}$ ,

$$\nabla F(\tilde{\Omega}_0) + \lambda \tilde{\mathbf{Z}} = \mathbf{0} \Rightarrow \nabla F(\Omega_0^*) + \mathbf{H} \tilde{\Delta} + \mathbf{R}(\tilde{\Omega}_0) + \lambda \tilde{\mathbf{Z}} = \mathbf{0} \Rightarrow \nabla_N F(\tilde{\Theta}) + \mathbf{H}_{NS} \tilde{\Delta}_S + \mathbf{R}_N(\tilde{\Delta}) + \lambda \tilde{\mathbf{Z}}_N = \mathbf{0}. \quad (23)$$

Due to (22),

$$\begin{aligned} \lambda \|\tilde{\mathbf{Z}}_N\|_\infty &= \left\| -\mathbf{H}_{NS} \tilde{\Delta}_S - \nabla_N F(\Omega_0^*) - \mathbf{R}_N(\tilde{\Delta}) \right\|_\infty \\ &\leq \left\| \mathbf{H}_{NS} \mathbf{H}_{SS}^{-1} \left[ -\nabla_S F(\Omega_0^*) - \mathbf{R}_S(\tilde{\Delta}) - \lambda \tilde{\mathbf{Z}}_S \right] \right\|_\infty + \left\| \nabla_N F(\Omega_0^*) + \mathbf{R}_N(\tilde{\Delta}) \right\|_\infty \\ &\leq \left\| \mathbf{H}_{NS} \mathbf{H}_{SS}^{-1} \right\|_\infty \left\| \nabla_S F(\Omega_0^*) + \mathbf{R}_S(\tilde{\Delta}) \right\|_\infty + \left\| \mathbf{H}_{NS} \mathbf{H}_{SS}^{-1} \right\|_\infty \left\| \lambda \tilde{\mathbf{Z}}_S \right\|_\infty + \left\| \nabla_N F(\Omega_0^*) + \mathbf{R}_N(\tilde{\Delta}) \right\|_\infty \end{aligned}$$

Further, we use the Assumption 4,

$$\begin{aligned} \lambda \|\tilde{\mathbf{Z}}_N\|_\infty &\leq (1 - \alpha) \left( \left\| \nabla_S F(\Omega_0^*) \right\|_\infty + \left\| \mathbf{R}_S(\tilde{\Delta}) \right\|_\infty \right) + (1 - \alpha)\lambda + \left( \left\| \nabla_N F(\Omega_0^*) \right\|_\infty + \left\| \mathbf{R}_N(\tilde{\Delta}) \right\|_\infty \right) \\ &\leq (2 - \alpha) \left( \left\| \nabla F(\Omega_0^*) \right\|_\infty + \left\| \mathbf{R}(\tilde{\Delta}) \right\|_\infty \right) + (1 - \alpha)\lambda, \end{aligned} \quad (24)$$

where we have used in the first inequality, and the third inequality is due to Assumption 4.

Now, we study  $\|\nabla F(\Omega_0^*)\|_\infty$ . By Lemma 4 and the assumption on  $\lambda$  in Theorem 1,  $\|\nabla F(\Theta^*)\|_\infty \leq \frac{\alpha C_4}{4} \sqrt{\frac{\log p}{n}} \leq \frac{\alpha \lambda}{4}$ , with probability larger than  $1 - \epsilon_d$ .

It remains to control  $\left\| \mathbf{R}(\tilde{\Delta}) \right\|_\infty$ . According to Assumption 5 and Lemma 4,

$$\left\| \mathbf{R}(\tilde{\Delta}) \right\|_\infty \leq C_3 \|\Delta\|_\infty^2 \leq C_3 r^2 \leq C_3 (4C_2 \lambda)^2 = \lambda \frac{64C_2^2 C_3}{\alpha} \frac{\alpha \lambda}{4} \leq \left( C_5 \sqrt{\frac{\log p}{n}} \right) \frac{64C_2^2 C_3}{\alpha} \frac{\alpha \lambda}{4}, \quad (25)$$

where in the last inequality we have used the assumption  $\lambda \leq C_5 \sqrt{\frac{\log p}{n}}$  in Theorem 1. Therefore, when we choose  $n \geq (64C_5 C_2^2 C_3 / \alpha)^2 \log p$  in Theorem 1, from (25), we can conclude that  $\left\| \mathbf{R}(\tilde{\Delta}) \right\|_\infty \leq \frac{\alpha \lambda}{4}$ . As a result,  $\lambda \|\hat{\mathbf{Z}}_N\|_\infty$  can be bounded by  $\lambda \|\tilde{\mathbf{Z}}_N\|_\infty < \alpha \lambda / 2 + \alpha \lambda / 2 + (1 - \alpha)\lambda = \lambda$ . Combined with Lemma 3, we demonstrate that any optimal solution of (5) satisfies  $\hat{\Theta}_N = \mathbf{0}$ . Furthermore, (9) controls the difference between the optimal solution of (5) and the real parameter by  $\left\| \tilde{\Delta}_S \right\|_\infty \leq r$ , by the fact that  $r \leq \|\Theta_S^*\|_\infty$  in Theorem 1,  $\hat{\Theta}_S$  shares the same sign with  $\Theta_S^*$ .

### Auxiliary Lemmas

In this section, we provide and prove the used auxiliary lemmas.

**Lemma 5.** For the graphical model defined in Section 2 parameterized by  $\Omega_0^*$ , the conditional distribution of  $Z_{ij}$  follows

$$(Z_{ij} \mid G_i = g_i) \sim \mathbf{Z}_{i,-j}^\top \Omega_{0,j} + M_{ij} + \epsilon_{ij},$$

where

$$[\mathbf{Z}_{i,-j}]_{j'} = \begin{cases} Z_{ij'} & j' \neq j \\ 1 & j' = j \end{cases}.$$

$\epsilon_{ij}$ 's follow the standard normal distribution, and  $\epsilon_{ij}$  is independent with  $\epsilon_{i'j}$  for  $j \neq j' \in [p]$ .

*Proof.* According to Lemma 1, the node-wise conditional distribution of a PLA-GGM follows a Gaussian distribution. Then, Lemma 5 can be proved.  $\square$

**Lemma 6.** For a kernel regression on  $\{x_i, y_i\}_{i=1}^n$  as the IID samples of  $(X, Y)$ . Assume that  $\mathbb{E}|Y|^s < \infty$  and  $\sup_X \int |Y|^s f(X, Y) dY \leq \infty$ . Given that  $n^{2\epsilon-1}h \rightarrow \infty$  for  $\epsilon < 1 - s^{-1}$ , we have

$$\sum_x \left| \frac{1}{n} \sum_{i=1}^n [K_h(x_i - x) - \mathbb{E}\{K_h(x_i - x)y_i\}] \right| = O_p \left( \left\{ \frac{\log(1/h)}{nh} \right\}^{1/2} \right).$$

*Proof.* Lemma 6 follows (Mack & Silverman, 1982).  $\square$

**Lemma 7.** Suppose  $\mathbf{Y} = \{Y_1, Y_2, \dots, Y_n\}$  follows a multivariate Gaussian distribution, then  $\max |Y_i|$  follows a sub-Gaussian distribution with variance  $\max \text{var}(Y_i)$ . Further, for any  $t > 0$ , the tail probability can be controlled via

$$\mathbb{P} \{ \max |\epsilon_{ij}| \geq t \} \leq \exp \left( \frac{-t^2}{2} \right).$$

**Lemma 8.** For any  $\epsilon > 0$ , there exists  $\delta > 0$  and  $N > 0$ , so that when  $n > N$ , we have

$$\mathbb{P} \left\{ \left\| \frac{\mathbf{X}'_j (\mathbf{I} - \mathbf{S}_j) \mathbf{M}_j}{n} \right\|_{\infty} \geq \delta c_n^2 \right\} \leq \epsilon,$$

uniformly for  $j \in [p]$ .

*Proof.* To start with, we review the definition of  $\mathbf{S}_{ij}$

$$\mathbf{S}_{ij} = \begin{bmatrix} \mathbf{1}_{g_{i'} > g^*} \mathbf{z}_{i', -j}^{\top} & 0 \end{bmatrix} (\mathbf{D}_{ij}^{\top} \mathbf{W}_i \mathbf{D}_{ij})^{-1} \mathbf{D}_{ij}^{\top} \mathbf{W}_i.$$

We first study  $\mathbf{D}_{ij}^{\top} \mathbf{W}_i \mathbf{D}_{ij}$ :

$$\mathbf{D}_{ij}^{\top} \mathbf{W}_i \mathbf{D}_{ij} = \begin{bmatrix} \sum_{i'=1}^n \mathbf{1}_{g_{i'} > g^*}^2 \mathbf{z}_{i', -j}^{\top} \mathbf{z}_{i', -j}^{\top} \psi(|g_{i'} - g_i|/h) & \sum_{i'=1}^n \mathbf{1}_{g_{i'} > g^*}^2 \mathbf{z}_{i', -j}^{\top} \mathbf{z}_{i', -j}^{\top} \frac{g_{i'} - g_i}{h} \psi(|g_{i'} - g_i|/h) \\ \sum_{i'=1}^n \mathbf{1}_{g_{i'} > g^*}^2 \mathbf{z}_{i', -j}^{\top} \mathbf{z}_{i', -j}^{\top} \frac{g_{i'} - g_i}{h} \psi(|g_{i'} - g_i|/h) & \sum_{i'=1}^n \mathbf{1}_{g_{i'} > g^*}^2 \mathbf{z}_{i', -j}^{\top} \mathbf{z}_{i', -j}^{\top} \left( \frac{g_{i'} - g_i}{h} \right)^2 \psi(|g_{i'} - g_i|/h) \end{bmatrix}.$$

To bound  $\mathbf{D}_{ij}^{\top} \mathbf{W}_i \mathbf{D}_{ij}$  uniformly over  $j$ , we consider a random vector  $\mathbf{B}_i = [\mathbf{1}_{g_{i'} > g^*} \mathbf{z}_i^{\top}, 1]^{\top}$ , with observations

$$\begin{bmatrix} \mathbf{b}_1 = [\mathbf{1}_{g_{i'} > g^*} \mathbf{z}_1^{\top}, 1] \\ \vdots \\ \mathbf{b}_n = [\mathbf{1}_{g_{i'} > g^*} \mathbf{z}_n^{\top}, 1] \end{bmatrix}.$$

Then, we study an auxiliary matrix

$$\mathbf{O}_i = \begin{bmatrix} \sum_{i'=1}^n \mathbf{1}_{g_{i'} > g^*}^2 \mathbf{b}_{i'} \mathbf{b}_{i'}^{\top} \psi(|g_{i'} - g_i|/h) & \sum_{i'=1}^n \mathbf{1}_{g_{i'} > g^*}^2 \mathbf{b}_{i'} \mathbf{b}_{i'}^{\top} \frac{g_{i'} - g_i}{h} \psi(|g_{i'} - g_i|/h) \\ \sum_{i'=1}^n \mathbf{1}_{g_{i'} > g^*}^2 \mathbf{b}_{i'} \mathbf{b}_{i'}^{\top} \frac{g_{i'} - g_i}{h} \psi(|g_{i'} - g_i|/h) & \sum_{i'=1}^n \mathbf{1}_{g_{i'} > g^*}^2 \mathbf{b}_{i'} \mathbf{b}_{i'}^{\top} \left( \frac{g_{i'} - g_i}{h} \right)^2 \psi(|g_{i'} - g_i|/h) \end{bmatrix}.$$

Therefore, the components of  $\mathbf{D}_{ij}^{\top} \mathbf{W}_i \mathbf{D}_{ij}$  belong to  $\mathbf{O}_i$ , and each part of  $\mathbf{O}_i$  is in the form of a kernel regression. By Lemma 6, we have

$$\mathbf{O}_i = n f(g_i) \mathbb{E} [\mathbf{B}_i \mathbf{B}_i^{\top} | g_i] \otimes \begin{bmatrix} 1 & 0 \\ 0 & \mu_2 \end{bmatrix} \{1 + O_p(c_n)\},$$

which holds uniformly for  $i$ . Therefore,

$$\mathbf{D}_{ij}^{\top} \mathbf{W}_i \mathbf{D}_{ij} = n f(g_i) \mathbb{E} \left[ \mathbf{1}_{g_{i'} > g^*}^2 \mathbf{z}_{i, -j} \mathbf{z}_{i, -j}^{\top} | g_i \right] \otimes \begin{bmatrix} 1 & 0 \\ 0 & \mu_2 \end{bmatrix} \{1 + O_p(c_n)\} \quad (26)$$

holds uniformly for  $i$  with the same  $O_p(c_n)$  for every  $j$ . Define

$$\boldsymbol{\alpha}_j(g_i) = \begin{bmatrix} \boldsymbol{\Omega}_{1:j} & \cdots & \boldsymbol{\Omega}_{n:j} \end{bmatrix}.$$

By the same technique, uniformly for  $i$  and with the same  $O_p(c_n)$  for every  $j$ , we can show

$$\mathbf{D}_{ij}^\top \mathbf{W}_i \mathbf{M}_j = nf(g_i) \mathbb{E} \left[ \mathbb{1}_{g_{i'} > g^*}^2 \mathbf{Z}_{i,-j} \mathbf{Z}_{i,-j}^\top \mid g_i \right] \otimes \begin{bmatrix} 1 & 0 \end{bmatrix}^\top \boldsymbol{\alpha}_j(g_i) \{1 + O_p(c_n)\}, \quad (27)$$

and

$$\mathbf{D}_{ij}^\top \mathbf{W}_i \mathbf{x}_j = nf(g_i) \mathbb{E} \left[ \mathbb{1}_{g_{i'} > g^*} \mathbf{Z}_{i,-j} \mathbf{Z}_{i,-j}^\top \mid g_i \right] \otimes \begin{bmatrix} 1 & 0 \end{bmatrix}^\top \{1 + O_p(c_n)\}. \quad (28)$$

Combining (26) and (27) we have

$$\begin{bmatrix} \tilde{\mathbf{x}}_j^\top & 0 \end{bmatrix} (\mathbf{D}_{ij}^\top \mathbf{W}_i \mathbf{D}_{ij})^{-1} \mathbf{D}_{ij}^\top \mathbf{W}_i \mathbf{M}_j = \tilde{\mathbf{x}}_j^\top \boldsymbol{\alpha}_j(g_i) \{1 + O_p(c_n)\}. \quad (29)$$

Similarly, combining (26) and (28), we have

$$\mathbf{x}'_j = \mathbf{x}_{ij} - \tilde{\mathbf{x}}_{ij} \mathbb{E}^{-1} \left[ \mathbb{1}_{g_{i'} > g^*}^2 \mathbf{Z}_{i,-j} \mathbf{Z}_{i,-j}^\top \mid g_i \right] \mathbb{E} \left[ \mathbb{1}_{g_{i'} > g^*} \mathbf{Z}_{i,-j} \mathbf{Z}_{i,-j}^\top \mid g_i \right]. \quad (30)$$

Next, we follow the rationale of the Lemma A.4 in (Fan et al., 2005), and combine (29) and (30). Finally, we have

$$\frac{\mathbf{x}'_j (\mathbf{I} - \mathbf{S}_j) \mathbf{M}_j}{n} = O_p(c_n^2)$$

uniformly for  $j$ . □

**Lemma 9.** For any  $\epsilon > 0$ , there exists  $N > 0$ , so that when  $n > N$ , we have

$$\|\mathbf{x}'_j{}^\top (\mathbf{I} - \mathbf{S}_j) \boldsymbol{\epsilon}_j\|_\infty \geq 2 \sum_{i=1}^n \left\{ \mathbf{x}_{ij} - \mathbb{E}^\top \left[ \mathbb{1}_{g_{i'} > g^*} \mathbf{Z}_{i,-j} \mathbf{Z}_{i,-j}^\top \mid g_i \right] \mathbb{E}^{-1} \left[ \mathbb{1}_{g_{i'} > g^*}^2 \mathbf{Z}_{i,-j} \mathbf{Z}_{i,-j}^\top \mid g_i \right] \tilde{\mathbf{x}}_{ij} \right\} \boldsymbol{\epsilon}_{ij},$$

uniformly for  $j \in [p]$  with probability less than  $\epsilon$ .

*Proof.* By definition, we have

$$\mathbf{x}'_j{}^\top (\mathbf{I} - \mathbf{S}_j) \boldsymbol{\epsilon}_j = \sum_{i=1}^n \mathbf{x}'_{ij} \left\{ \boldsymbol{\epsilon}_{ij} - \begin{bmatrix} \tilde{\mathbf{x}}_{ij}^\top & 0 \end{bmatrix} (\mathbf{D}_{ij}^\top \mathbf{W}_i \mathbf{D}_{ij})^{-1} \mathbf{D}_{ij}^\top \mathbf{W}_i \boldsymbol{\epsilon}_j \right\}.$$

Using the technique in (26), we have

$$\begin{bmatrix} \tilde{\mathbf{x}}_{ij}^\top & 0 \end{bmatrix} (\mathbf{D}_{ij}^\top \mathbf{W}_i \mathbf{D}_{ij})^{-1} \mathbf{D}_{ij}^\top \mathbf{W}_i \boldsymbol{\epsilon}_j = \tilde{\mathbf{x}}_{ij} \mathbb{E}^{-1} \left[ \mathbb{1}_{g_{i'} > g^*}^2 \mathbf{Z}_{i,-j} \mathbf{Z}_{i,-j}^\top \mid g_i \right] \mathbb{E} \left[ \tilde{\mathbf{x}}_{ij}^\top \mid g_i \right] O_p(c_n).$$

Therefore,

$$\mathbf{x}'_j{}^\top (\mathbf{I} - \mathbf{S}_j) \boldsymbol{\epsilon}_j = \sum_{i=1}^n \left\{ \mathbf{x}_{ij} - \mathbb{E}^\top \left[ \mathbb{1}_{g_{i'} > g^*} \mathbf{Z}_{i,-j} \mathbf{Z}_{i,-j}^\top \mid g_i \right] \mathbb{E}^{-1} \left[ \mathbb{1}_{g_{i'} > g^*}^2 \mathbf{Z}_{i,-j} \mathbf{Z}_{i,-j}^\top \mid g_i \right] \tilde{\mathbf{x}}_{ij} \right\} \boldsymbol{\epsilon}_{ij} [1 + o_p(1)],$$

uniformly for  $j$ . □

## D. Proof of Theorem 2

We first study CON-GGMs. According to (6) and (Eaton, 1983), we have

$$[\text{cov}(\mathbf{Z} | G = g)]^{-1} = [\boldsymbol{\Sigma}_{\mathbf{Z}\mathbf{Z}} - \boldsymbol{\Sigma}_{\mathbf{Z}G}\boldsymbol{\Sigma}_{GG}^{-1}\boldsymbol{\Sigma}_{G\mathbf{Z}}]^{-1},$$

whose right-hand side has nothing to do with  $g$ . Therefore, the conditional distribution of  $\mathbf{Z} | G = g$  follows a GGM with parameter  $[\boldsymbol{\Sigma}_{\mathbf{Z}\mathbf{Z}} - \boldsymbol{\Sigma}_{\mathbf{Z}G}\boldsymbol{\Sigma}_{GG}^{-1}\boldsymbol{\Sigma}_{G\mathbf{Z}}]^{-1}$  irrelevant to  $g$ . In other words CON-GGM is equivalent to assuming that  $G$  follows a normal distribution and  $\mathbf{R}(g) = 0$  on the basis of the proposed PLA-GGM.

Then, we study LR-GGMs. Again, given  $G = g$  for any  $g$ , we have

$$[\text{cov}(\mathbf{Z} | G = g)]^{-1} = \boldsymbol{\Omega}_0,$$

which has nothing to do with  $G$  either. Given  $G = g$ , the conditional distribution of  $\mathbf{Z} | G = g$  follows a GGM with the parameter  $\boldsymbol{\Omega}$ . Therefore, LR-GGM is a special case of the proposed PLA-GGM by assuming  $\mathbf{R}(g) = 0$ .

## E. Experiments

### Data Simulation

To simulate the samples from PLA-GGMs, we first define

$$f(g) = \begin{cases} g - 10 & g > 12 \\ x + \frac{(x-12)^2}{4} - 11 & 10 < g \leq 12 \\ 0 & -10 < g \leq 10 \\ x + \frac{(x+12)^2}{4} + 11 & -12 < g \leq -10 \\ g + 10 & g \leq -12 \end{cases}$$

We provide the following procedure:

1. We consider  $p = 10, 20, 50, 100$ , and implement the following steps separately.
2. We randomly generate a sparse precision matrix as  $\Omega_0$ . Specifically, each element of  $\Omega_0$  is drawn randomly to be non-zero with probability 0.3.
3. A dense precision matrix  $\mathbf{W}$  is generated to build the confounding.
4. We take  $\{-400, \dots, 0, \dots, 399\}$  as the confounders. For each  $g \in \{-400, \dots, 0, \dots, 399\}$ , the precision matrix is selected to be  $\boldsymbol{\Omega}(g) = \boldsymbol{\Omega}_0 + f(g)\mathbf{W}$ , and a sample is generated by a GGM with parameter  $\boldsymbol{\Omega}(g)$ . Thus, we get 800 samples.

Note that the procedure is equivalent to selecting  $g^* = 10$ .

### Glass Brains for Brain Function Connectivity Estimation

We report the glass brains from other angles for the brain function connectivity estimation experiment in Section 6.2.

### Schizophrenia Diagnosis using Different $\mathbb{1}_{\{|g| \geq g^*\}}$ 's

We conduct the analysis in Section 6.2 using different  $\mathbb{1}_{\{|g| \geq g^*\}}$ 's. Specifically, we consider the function  $1 - \exp(-kx^2)/2$  using  $k = 144, 150$ . The achieved accuracy using the parameter selected by the 10-fold cross validation and AIC are reported in Figure 9. The performance of PLA-GGMs is not hugely affected when selecting  $\mathbb{1}_{\{|g| \geq g^*\}}$  in a reasonable range, which is consistent with our analysis in Theorem 1. Note that, if we select  $k$  too large, the PPL method will be not applicable. The reason is that a large  $k$  corresponds to a small  $g^*$ , and will induce few non-confounded samples observed. As a result,  $(\mathbf{D}_{ij}^\top \mathbf{W}_i \mathbf{D}_{ij})$  will be singular. In practice, if we use a relative large  $g^*$  corresponding to a small  $k$ , (2) will tend to be like  $\mathbf{R}(g) = 0$  used in CON-GGMs and LR-GGMs.



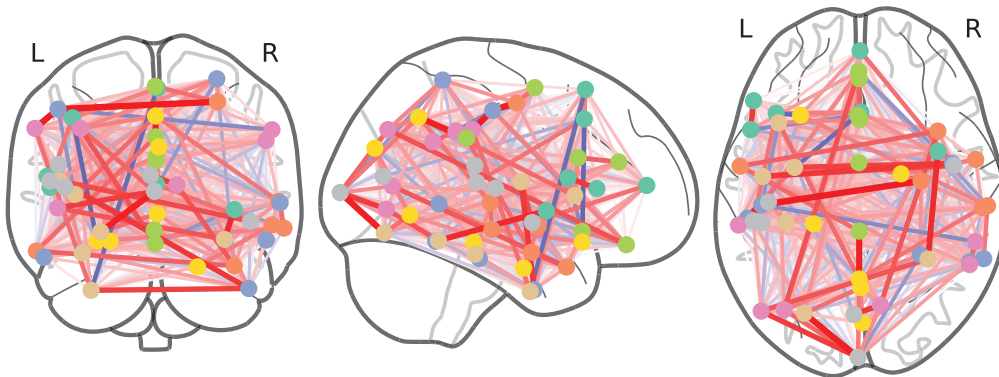

Figure 5: Controls using PLA-GGMs

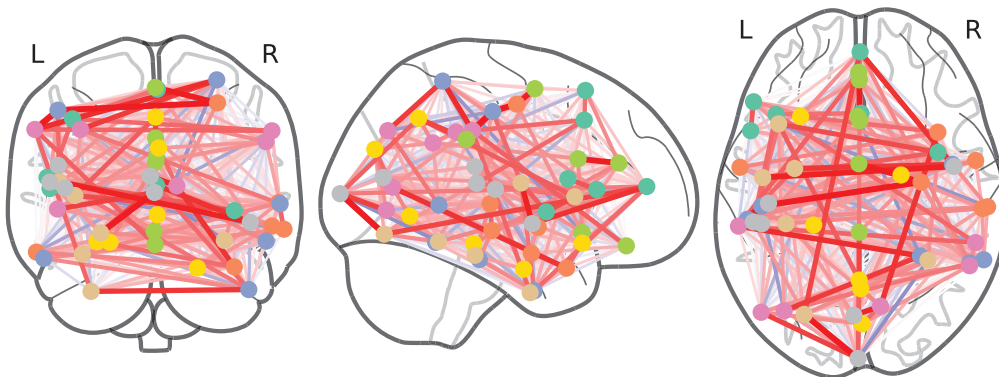

Figure 6: Patients using PLA-GGMs

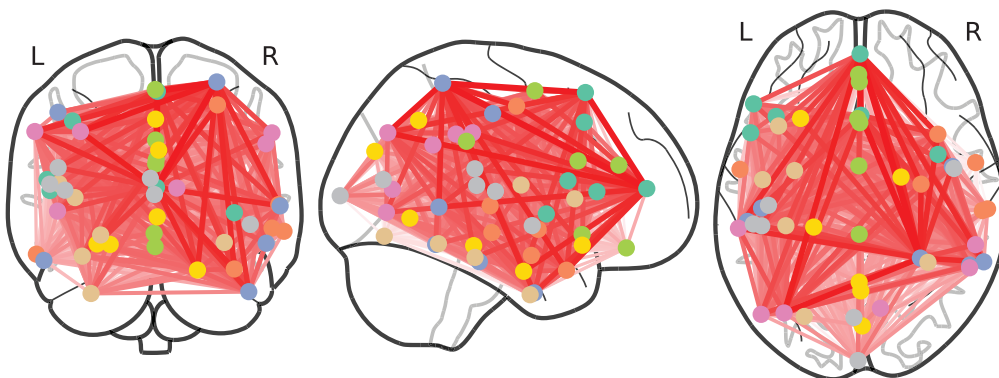

Figure 7: Controls using LR-GGMs

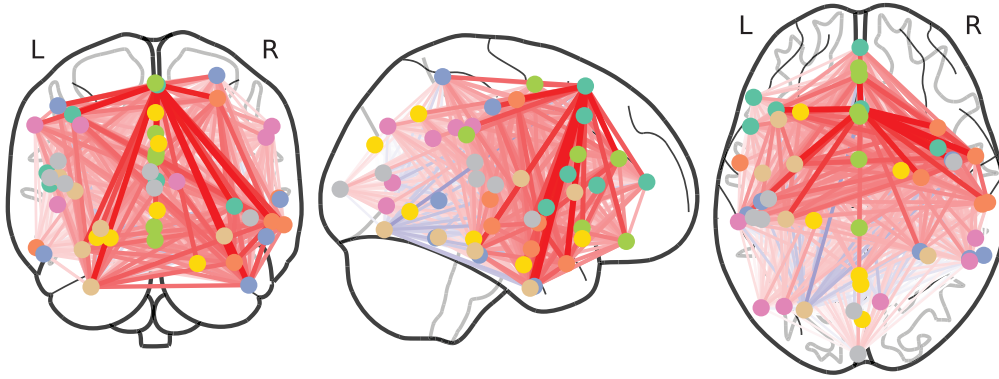

Figure 8: Patients using LR-GGMs

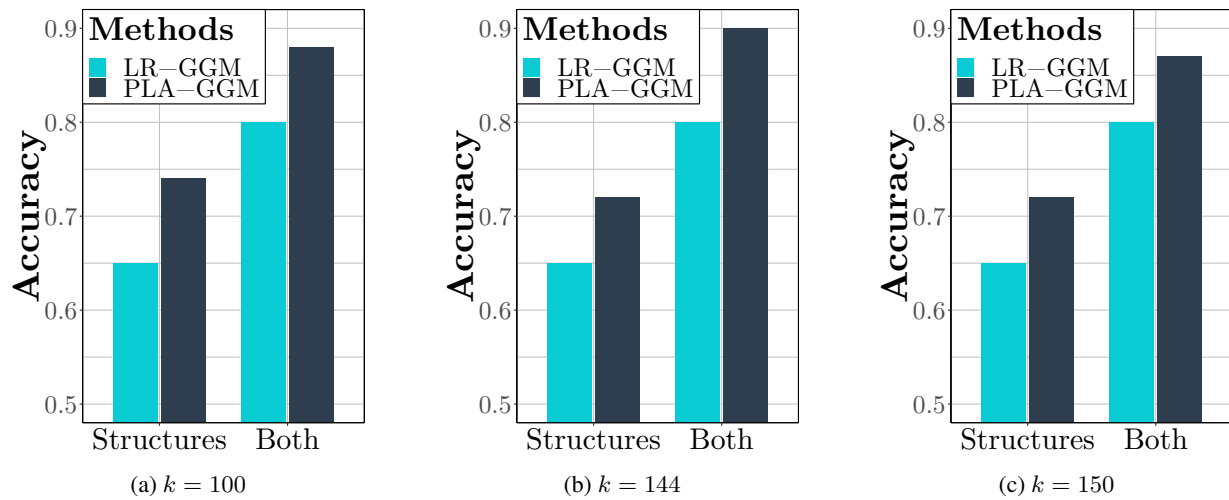

Figure 9: Diagnosis using different  $\mathbb{1}_{\{|g| \geq g^*\}}$ 's.
